# Supplementary material for: BAG3 Alleviates Atherosclerosis by Inhibiting Endothelial-to-Mesenchymal Transition via Autophagy Activation
Source: MDPI journal article supplement (doi:10.3390/genes13081338), 2022-07-26
Supplement: s1 [file s1]

## Supplemental materials

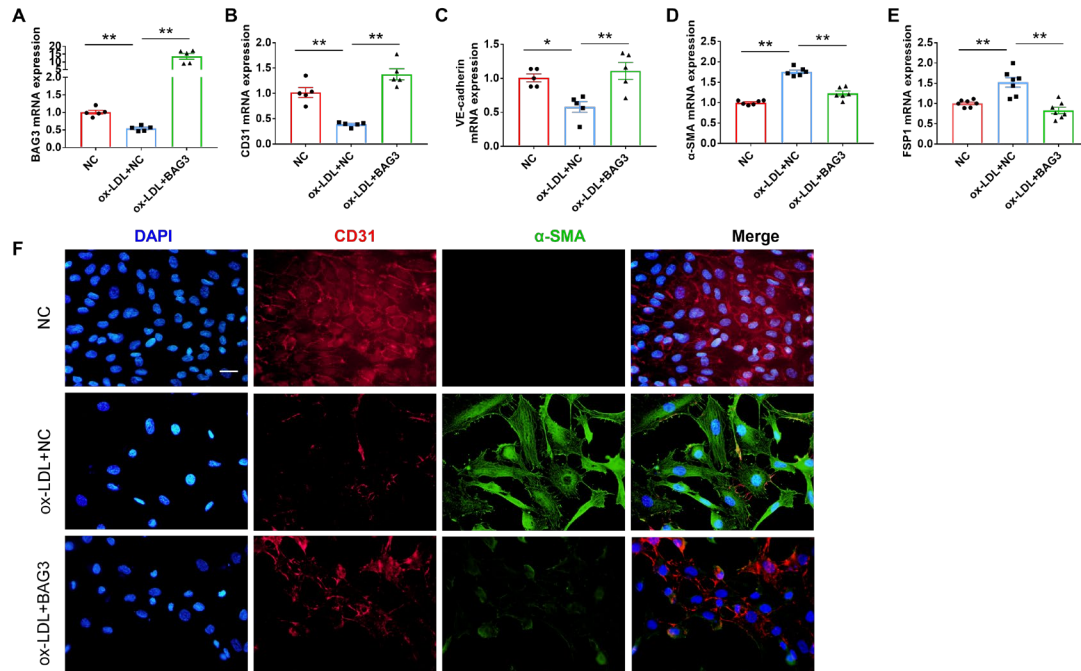

**Figure S1.** BAG3 prevents EndMT in vitro. (A-E) BAG3, CD31, VE-cadherin, α-SMA and FSP1 mRNA expressions were analyzed by RT-PCR, normalized to GAPDH. Fold changes are shown (n=5). (F) Representative images of double-fluorescent staining with CD31 (red) and α-SMA (green). The nuclei were stained blue with DAPI. Immunofluorescence signals of CD31 and α-SMA were quantified (Scale bar indicates 50 μm) (n=3). The data are presented as the mean ± S.E.M. \* $P < 0.05$ , \*\* $P < 0.01$ .

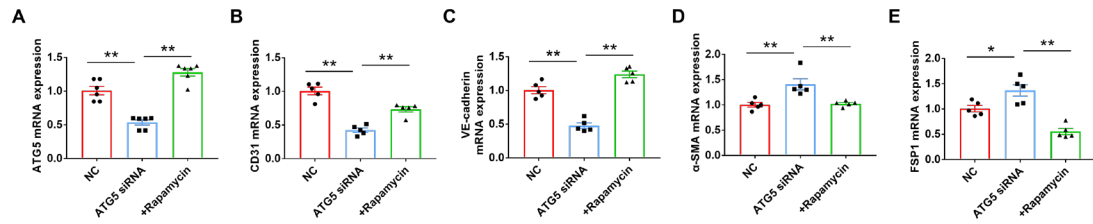

**Figure S2.** Inhibition of autophagy induces EndMT in vitro. (A-E) ATG5, CD31, VE-cadherin,  $\alpha$ -SMA and FSP1 mRNA expressions were analyzed by RT-PCR, normalized to GAPDH. Fold changes are shown (n=5) The data are presented as the mean  $\pm$  S.E.M. \* $P < 0.05$ , \*\* $P < 0.01$ .

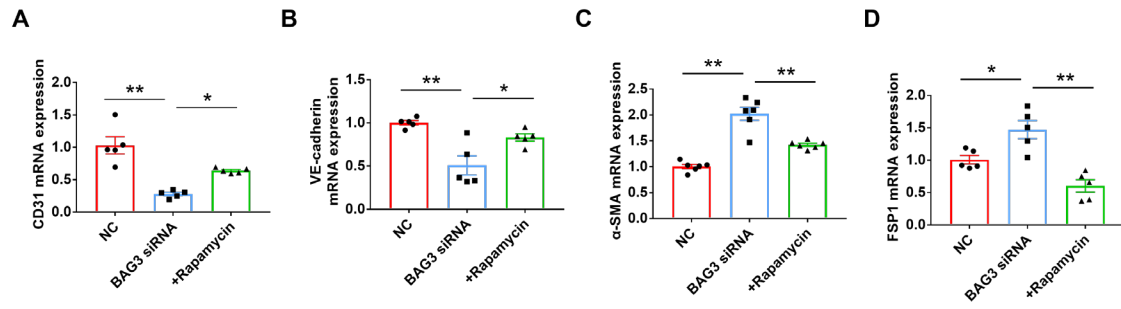

**Figure S3.** BAG3 suppresses EndMT by inducing autophagy in vitro. (A-D) CD31, VE-cadherin,  $\alpha$ -SMA and FSP1 mRNA expressions were analyzed by RT-PCR, normalized to GAPDH. Fold changes are shown (n=5). The data are presented as the mean  $\pm$  S.E.M. \* $P$  < 0.05, \*\* $P$  < 0.01.
